# Supplementary material for: The Toxic Effects of Cigarette Additives. Philip Morris' Project Mix Reconsidered: An Analysis of Documents Released through Litigation
Source: PLoS Med. 2011 Dec 20;8(12):e1001145. doi: 10.1371/journal.pmed.1001145 (PMC3243707; doi:10.1371/journal.pmed.1001145)
Supplement: Alternative Language Text S2 — German translation of Text S1 by TK. (PDF) [file pmed.1001145.s009.pdf]

# Die toxische Wirkung von Zigarettenadditiven. Das Philip Morris Projekt Mix auf dem Prüfstand: eine Analyse von Dokumenten, die als Folge von Haftungsklagen herausgegeben wurden

## **Ergänzender Text**

Marcia S. Wertz, PhD RN

Thomas Kyriss, MD

Suman Paranjape, PhD, MPH

Stanton A. Glantz, PhD

*PLoS Medicine* 8(12): e1001145 doi: 10.1371/journal.pmed.1001145

**Tabelle S-1. Kombinierte Liste für die Analyse von Rauchinhaltsstoffen der CPSC, IARC und aus Projekt MIX**

|                            |                          |                             |
|----------------------------|--------------------------|-----------------------------|
| 1,1-Dimethylhydrazin       | Benzo[c]phenanthren      | NAB *                       |
| 1,3-Butadien (µg/cig) *    | Benzo[c]pyren            | Naphthalin†                 |
| 1,4-Dimethylphenanthren    | Benzo[ghi]perylene†      | NAT *                       |
| 1-Methylchrysen            | Bernsteinsäure           | NDBA                        |
| 1-Methylphenanthren        | Blei (ng/cig) *          | NDEA                        |
| 1-Naphthylamin             | Cadmium *                | NDELA *                     |
| 2,3-dimethylmaleicanhydrit | Captan                   | NDMA *                      |
| 2-Cresol                   | Carbazol                 | NDPA                        |
| 2-Methylchrysen            | Catechol *               | NEMA                        |
| 2-Methylfluoranthren       | Cholesterin              | Nickel *                    |
| 2-Nnaphthylamin            | Chrom *                  | Nikotin *                   |
| 2-Nitropropan              | Chrysen *                | N-Nitroso-N-methylethylamin |
| 3- und 4-Kresol            | Coronen                  | NNK *                       |
| 3- und 4-Methylcatechol    | Crotonaldehyd            | NNN *                       |
| 3-Methylchrysen            | Cumarin                  | N-phenyl-2-naphthylamin     |
| 3-Methylfluoranthren       | Cyanwasserstoff *        | NPIP                        |
| 3-Methylpyridin            | DDT                      | NPY *                       |
| 4-Aminobiphenyl            | Dibenz [a,h] acridin     | Ortho-anisidin              |
| 4-Methylchrysen            | Dibenz [a,j] acridin *   | O-cresol†                   |
| 5-Methylchrysen *          | Dibenz[-]anthracen *     | O-toluidine                 |
| 6-Methylchrysen            | Dibenzo [a,e]pyren       | P-cresol†                   |
| 7H-Dibenzo[c,g]carbazol    | Dibenzo [a,h]pyren       | Perylen                     |
| Acenaphthen†               | Dibenzo [a,i]pyren       | pH Wert                     |
| Acenaphthylen†             | Dibenzo[a,e]fluoranthren | Phenanthren *               |
| Acetaldehyd *              | Endrin                   | Phenol *                    |
| Acetamid                   | Essigsäure               | Propionaldehyd              |
| Aceton                     | Ethylenoxid              | Propylenoxid                |
| Akrolein *                 | Eugenol                  | Pyren *                     |
| Akrylonitril *             | Fluoranthren *           | Pyridin                     |
| Ameisensäure               | Fluoren *                | Redox Potential             |
| Ammoniak‡                  | Formaldehyd *            | Resorcin *                  |
| Anilin                     | Hydrazin                 | Selen                       |
| Anthanthren                | Hydroquinon *            | Stickstoffoxide *           |
| Anthracen *                | Indeno [1,2,3-cd]pyren * | Styrol                      |
| Arsen *                    | Isopren (µg/cig) *       | Teer                        |
| Benz[a]acridin             | Kohlenmonoxid *          | Toluol *                    |
| Benz[a]anthracen *         | Malathion                | TPM (Rohkondensat)*         |
| Benz[c]acridin             | Maleinsäureanhydrid      | Triphenylen                 |
| Benzen *                   | Maleinsäurehydrazid      | Urethan                     |
| Benzo[-] fluoren           | M-Cresol†                | Vinylchlorid *              |
| Benzo[-]fluoranthren *     | Methanol                 | Wasser *                    |
| Benzo[a]pyren *            | Methylacrylat            | Y-butyrolactose             |

\*Eingeschlossen in Projekt MIX und den Listen der CPSC oder IARC

†Eingeschlossen in Projekt MIX aber nicht in den Listen der CPSC oder IARC

‡Eingeschlossen in Projekt MIX, aber nicht publiziert [1]

| <b>Table S-2. 19 Rauchinhaltsstoffe, die nicht in den veröffentlichten Radarplots aufgeführt sind [1]</b>                                                                                                                                                                                                                         |                              |                          |
|-----------------------------------------------------------------------------------------------------------------------------------------------------------------------------------------------------------------------------------------------------------------------------------------------------------------------------------|------------------------------|--------------------------|
| Acenaphthalen N* IG2 & IG3                                                                                                                                                                                                                                                                                                        | Acenaphthen N IG2 & IG3      | Fluoren N IG2            |
| Phenanthren H IG1 & IG3 N IG2                                                                                                                                                                                                                                                                                                     | Anthracen H IG1 & IG3 N IG2  | Fluoranthren H IG1 & IG3 |
| Pyren H IG1 & IG3                                                                                                                                                                                                                                                                                                                 | Benz[a]anthracen H IG1 & IG3 | Chrysen H IG1 & IG3      |
| Benzo[-]fluoranthren H in allen Gruppen                                                                                                                                                                                                                                                                                           | Indeno [1,2,3-cd]pyren H IG1 | Dibenz[-]anthracen       |
| Benzo[ghi]perylene H in allen Gruppen                                                                                                                                                                                                                                                                                             | 5-Methylchrysen              | Dibenz[a,j]acridin       |
| NDMA                                                                                                                                                                                                                                                                                                                              | NDELA                        | Chrom                    |
| Nickel                                                                                                                                                                                                                                                                                                                            |                              |                          |
| *zeigt an, dass der Wert im additivhaltigen Rauch statistisch signifikant verändert ist verglichen mit dem Rauch der Kontrollzigarette bezogen auf eine Zigarette (N = niedriger als in Kontrollzigaretten, H = höher als Kontrolle, IG = Zutaten Gruppe) mitgeteilt in der von Rustemeier [1] veröffentlichten Tabelle von 2002. |                              |                          |

| <b>Table S-3. Statistisch signifikante toxikologische Veränderungen durch Zigarettenrauch der drei Additivgruppen mit je zwei unterschiedlichen Dosierungen (Nur statistisch signifikante Ergebnisse sind abgebildet.)</b> |                                                                                                 |                         |                                                                                                     |                                  |
|----------------------------------------------------------------------------------------------------------------------------------------------------------------------------------------------------------------------------|-------------------------------------------------------------------------------------------------|-------------------------|-----------------------------------------------------------------------------------------------------|----------------------------------|
| <b>Biologische Parameter</b>                                                                                                                                                                                               | <b>Veröffentlichte Auswertung basierend auf den beobachteten Daten [2] (N=4-14 pro Gruppe†)</b> |                         | <b>Bei Annahme der selben Durchschnittswerte und Standardabweichungen, aber mit N=50 pro Gruppe</b> |                                  |
|                                                                                                                                                                                                                            | <b>Männliche Ratten</b>                                                                         | <b>Weibliche Ratten</b> | <b>Männliche Ratten</b>                                                                             | <b>Weibliche Ratten</b>          |
| Anteil des Carboxyhämoglobin im Blut (%)                                                                                                                                                                                   |                                                                                                 |                         | Angestiegen 1N<br>Gefallen 2N 1H                                                                    | Gefallen in allen Gruppen        |
| Nikotinmetaboliten* im Urin (%) NCOT                                                                                                                                                                                       |                                                                                                 |                         | Angestiegen 1N<br>Gefallen 1H                                                                       | Angestiegen 1N 2N 3H             |
| <b>Serumchemie</b>                                                                                                                                                                                                         |                                                                                                 |                         |                                                                                                     |                                  |
| Alkalische Phosphatase                                                                                                                                                                                                     |                                                                                                 |                         | Gefallen 2N                                                                                         | Angestiegen 2H                   |
| Aspartataminotransferase (AST)                                                                                                                                                                                             |                                                                                                 |                         |                                                                                                     | Angestiegen 2H<br>Gefallen 3H    |
| Alaninaminotransferase (ALT)                                                                                                                                                                                               |                                                                                                 |                         | Gefallen 1H 2H                                                                                      | Angestiegen 2H<br>Gefallen 3N 3H |
| γGlutamyltransferase (GGT)                                                                                                                                                                                                 |                                                                                                 |                         |                                                                                                     | Angestiegen 1N 2N 2H 3N          |
| Gesamtcholesterin                                                                                                                                                                                                          | Angestiegen 2N 3N 3H                                                                            |                         | Angestiegen 1N 2N 2H 3N 3H                                                                          | Angestiegen 3N                   |
| Triglyzeride                                                                                                                                                                                                               |                                                                                                 |                         |                                                                                                     | Angestiegen 1N 2N 2H 3N          |
| Glukose                                                                                                                                                                                                                    |                                                                                                 |                         |                                                                                                     | Gefallen 1H 2N 2H 3N             |
| Harnstoff                                                                                                                                                                                                                  | Gefallen 3N 3H                                                                                  | Angestiegen 1H 2N       | Gefallen in allen Gruppen                                                                           | Angestiegen in allen Gruppen     |
| <b>Hämatologie</b>                                                                                                                                                                                                         |                                                                                                 |                         |                                                                                                     |                                  |
| Erythrozyten                                                                                                                                                                                                               |                                                                                                 |                         | Angestiegen 2N 3N 3H                                                                                | Angestiegen 1H 2H 3N             |
| Hämatokrit                                                                                                                                                                                                                 |                                                                                                 |                         | Angestiegen 1H 2N 3N                                                                                | Angestiegen 1H 2H 3N             |
| Hämoglobin                                                                                                                                                                                                                 |                                                                                                 |                         | Angestiegen 1H 2N 2H 3N 3H                                                                          | Angestiegen 2H 3N                |
| Thrombozyten                                                                                                                                                                                                               |                                                                                                 |                         | Angestiegen 3H                                                                                      | Angestiegen 1N 2N 3N 3H          |
| Leukozyten                                                                                                                                                                                                                 |                                                                                                 |                         | Angestiegen 1N 2H                                                                                   | Angestiegen 1N 2H                |
| Neutrophile                                                                                                                                                                                                                |                                                                                                 |                         |                                                                                                     | Gefallen 3H                      |
| Lymphozyten                                                                                                                                                                                                                |                                                                                                 |                         | Angestiegen 1N 2H 3N 3H                                                                             | Gefallen 1N 2H                   |
| <b>Organgewichte</b>                                                                                                                                                                                                       |                                                                                                 |                         |                                                                                                     |                                  |
| Thymus                                                                                                                                                                                                                     | Angestiegen 1N 1H 2H 3N 3H                                                                      | Angestiegen 3H          | Angestiegen in allen Gruppen                                                                        | Angestiegen 3H<br>Gefallen 1N    |
| Leber                                                                                                                                                                                                                      | Angestiegen 2H                                                                                  |                         | Angestiegen 2H 3H                                                                                   | Angestiegen 2N                   |
| Nebennieren                                                                                                                                                                                                                |                                                                                                 |                         |                                                                                                     | Angestiegen 1N 2N 2H             |
| Lungen                                                                                                                                                                                                                     | Angestiegen 2H                                                                                  |                         | Angestiegen 1H 2N                                                                                   | Angestiegen 1N 1H 2N 3H          |
| Nieren                                                                                                                                                                                                                     |                                                                                                 |                         |                                                                                                     |                                  |
| <b>Histopathologie der Nase</b>                                                                                                                                                                                            |                                                                                                 |                         |                                                                                                     |                                  |
| Nasenhöhle Level 1                                                                                                                                                                                                         |                                                                                                 |                         |                                                                                                     |                                  |
| Hyperplasie von Respir.epithel                                                                                                                                                                                             |                                                                                                 | Angestiegen 1N          | Gefallen 1N 1H 2H                                                                                   | Angestiegen 1N 1H 2N 2H 3N       |

|                                                          |                |                   |                         |                               |
|----------------------------------------------------------|----------------|-------------------|-------------------------|-------------------------------|
| und der Reservezellen                                    |                |                   |                         |                               |
| Plattenepithelhyperplasie                                |                |                   |                         | Angestiegen 3H<br>Gefallen 2H |
| Gobletzellhyperplasie                                    |                |                   |                         | Angestiegen 3H                |
| Verlust von Gobletzellen                                 |                |                   | Angestiegen 1N 1H 2N    | Gefallen 2N 2H 3N 3H          |
| <i>Nasenhöhle Level 2</i>                                |                |                   |                         |                               |
| Hyperplasie von Respir.epithel<br>und der Reservezellen  |                |                   |                         | Angestiegen 2H 3H             |
| Atrophie der Riechschleimhaut                            | Gefallen 2H    | Angestiegen 2N 2H | Gefallen 1N 2H 3N       | Angestiegen 1N 1H 2N 2H 3N    |
| Plattenepithelhyperplasie                                |                |                   |                         | Angestiegen 2H                |
| <i>Nasenhöhle Level 3</i>                                |                |                   |                         |                               |
| Atrophie der Riechschleimhaut                            |                | Angestiegen 2N 2H | Gefallen 2H 3N          | Angestiegen 1N 1H 2N 2H 3N    |
| Plattenepithelhyperplasie                                |                | Angestiegen 2H    | Gefallen 2H             | Angestiegen 1N 1H 2N 2H 3N    |
| <i>Nasenhöhle Level 4</i>                                |                |                   |                         |                               |
| Atrophie der Riechschleimhaut                            |                |                   |                         | Angestiegen 1N 2N             |
| Plattenepithelhyperplasie                                |                |                   | Gefallen 2H             | Angestiegen 1N 2H             |
| <b>Histopathologie des Larynx</b>                        |                |                   |                         |                               |
| <i>Epiglottis</i>                                        |                |                   |                         |                               |
| Metaplasie des mehrreihigen<br>Flimmerepithels           |                |                   | Angestiegen 2N 2H       | Gefallen 1H 3N 3H             |
| Plattenepithelhyperplasie                                |                |                   | Angestiegen 1H 2N 2H 3N | Angestiegen 1H                |
| <i>Larynxgrund (Aryknorpel)</i>                          |                |                   |                         |                               |
| Metaplasie des mehrreihigen<br>Flimmerepithels           |                | Gefallen 3H       |                         | Gefallen in allen Gruppen     |
| <i>Stimmbänder, Mitte medial</i>                         |                |                   |                         |                               |
| Plattenepithelhyperplasie                                |                |                   | Angestiegen 1N 3H       | Gefallen 1H 3N 3H             |
| <i>Stimmbänder, oben medial</i>                          |                |                   |                         |                               |
| Metaplasie des mehrreihigen<br>Flimmerepithels           |                |                   |                         |                               |
| <i>Stimmfalten</i>                                       |                |                   |                         |                               |
| Plattenepithelhyperplasie                                |                |                   |                         | Gefallen 1H 2N 2H             |
| <b>Dicke des Larynxepithels</b>                          |                |                   |                         |                               |
| <i>Larynxgrund</i>                                       | Angestiegen 3N | Angestiegen 3N 3H | Angestiegen 2N 2H 3N    | Gefallen 1H 3N 3H             |
| <b>Histopathologie der Trachea, Bronchien and Lungen</b> |                |                   |                         |                               |
| <i>Trachealbifurkation</i>                               |                |                   |                         |                               |
| Hyperplasie von Respir.epithel<br>und Gobletzellen       |                |                   | Angestiegen 2N          | Gefallen 3H                   |
| <i>Rechte Lung</i>                                       |                |                   |                         |                               |
| Alveolarmakrophagen                                      |                |                   | Angestiegen 3H          | Angestiegen 3H                |

|                                                                                                                                                                                                                                                                                                                                                                                                                                                                                                                                                                                                                                                                                                                                                                                                                                                                                                                                                                                                                                                                                                    |  |  |                               |             |
|----------------------------------------------------------------------------------------------------------------------------------------------------------------------------------------------------------------------------------------------------------------------------------------------------------------------------------------------------------------------------------------------------------------------------------------------------------------------------------------------------------------------------------------------------------------------------------------------------------------------------------------------------------------------------------------------------------------------------------------------------------------------------------------------------------------------------------------------------------------------------------------------------------------------------------------------------------------------------------------------------------------------------------------------------------------------------------------------------|--|--|-------------------------------|-------------|
|                                                                                                                                                                                                                                                                                                                                                                                                                                                                                                                                                                                                                                                                                                                                                                                                                                                                                                                                                                                                                                                                                                    |  |  |                               | Gefallen 2H |
| <i>Linke Lunge</i>                                                                                                                                                                                                                                                                                                                                                                                                                                                                                                                                                                                                                                                                                                                                                                                                                                                                                                                                                                                                                                                                                 |  |  |                               |             |
| Hyperplasie von Respir.epithel<br>und Gobletzellen                                                                                                                                                                                                                                                                                                                                                                                                                                                                                                                                                                                                                                                                                                                                                                                                                                                                                                                                                                                                                                                 |  |  | Angestiegen 2H                | Gefallen 3H |
| Alveolarmakrophagen                                                                                                                                                                                                                                                                                                                                                                                                                                                                                                                                                                                                                                                                                                                                                                                                                                                                                                                                                                                                                                                                                |  |  | Angestiegen 3H<br>Gefallen 2H |             |
| <p>†N variierte (z.B.4-5 Ratten pro Gruppe für HbCO%, 8 Ratten pro Gruppe für Nikotinemetabolite, 8-10 Ratten pro Gruppe für Serumchemie, Hämatologie und pathologische Untersuchungen, ausgenommen 14 Ratten in allen Kontrollgruppen).</p> <p>Nummer entspricht der <i>Zutaten Gruppe</i> (z.B. 2 = <i>Zutaten Gruppe 2</i>); N oder H beziehen sich auf niedrige oder hohe Dosierungen der Additive in den Gruppen.</p> <p>Nur von PM Wissenschaftlern [2] mitgeteilte statistisch signifikante Unterschiede (erste zwei Spalten, analytische Methodik entspricht der Publikation von PM) und die Re-Analyse der Autoren unter der Annahme dass die selben Durchschnittswerte und Standardabweichungen wie von PM mitgeteilt, aber eine angehobene Stichprobengröße von 50 Ratten pro Gruppe vorliegen (letzte zwei Spalten)</p> <p>Ein leeres Feld zeigt statistisch nicht signifikante Unterschiede an.</p> <p>*Zigaretten mit Additiven hatten angeblich weniger Tabak (ersetzt durch Additive), und daher weniger Nikotin, was geringere Cotininspiegel erklären kann, sofern bestimmt.</p> |  |  |                               |             |

## **LITERATUR**

1. Rustemeier K, Stabbert R, Haussmann HJ, Roemer E, Carmines EL (2002) Evaluation of the potential effects of ingredients added to cigarettes. Part 2: chemical composition of mainstream smoke. Food Chem Toxicol 40: 93-104.
2. Vanscheeuwijck PM, Teredesai A, Terpstra PM, Verbeeck J, Kuhl P, et al. (2002) Evaluation of the potential effects of ingredients added to cigarettes. Part 4: subchronic inhalation toxicity. Food Chem Toxicol 40: 113-131.
