# Supplementary material for: The Toxic Effects of Cigarette Additives. Philip Morris' Project Mix Reconsidered: An Analysis of Documents Released through Litigation
Source: PubMed Central journal article supplement (PMC3243707; doi:10.1371/journal.pmed.1001145), 2011-12-20
Supplement: pmed.1001145.s001.pdf [file pmed.1001145.s001.pdf]

**THE TOXIC EFFECTS OF CIGARETTE ADDITIVES:  
PHILIP MORRIS' PROJECT MIX RECONSIDERED**

**Supplementary Text**

Marcia S. Wertz, PhD RN

Thomas Kyriss, MD

Suman Paranjape, PhD, MPH

Stanton A. Glantz, PhD

| Table S-1. Combined List of CPSC, IARC and Project MIX Smoke Constituents for Analysis |                           |                              |
|----------------------------------------------------------------------------------------|---------------------------|------------------------------|
| 1,1-dimethylhydrazine                                                                  | Benzo[c]phenanthrene      | Naphthalene†                 |
| 1,3-Butadiene (µg/cig) *                                                               | Benzo[c]pyrene            | NAT *                        |
| 1,4-dimethylphenanthrene                                                               | Benzo[ghi]perylene†       | NDBA                         |
| 1-methylchrysene                                                                       | Cadmium *                 | NDEA                         |
| 1-methylphenanthrene                                                                   | Captan                    | NDELA *                      |
| 1-naphthylamine                                                                        | carbazole                 | NDMA *                       |
| 2,3-dimethylmaleic anhydride                                                           | Carbon monoxide *         | NDPA                         |
| 2-cresol                                                                               | Catechol *                | NEMA                         |
| 2-methylchrysene                                                                       | Cholesterol               | Nickel *                     |
| 2-methylfluoranthene                                                                   | Chromium *                | Nicotine *                   |
| 2-naphthylamine                                                                        | Chrysene *                | Nitrogen oxides *            |
| 2-nitropropane                                                                         | Coronene                  | N-Nitroso-N-methylethylamine |
| 3- and 4-cresol                                                                        | Coumarin                  | NNK *                        |
| 3- and 4-methylcatechol                                                                | Croton aldehyde           | NNN *                        |
| 3-methylchrysene                                                                       | DDT                       | N-phenyl-2-naphthylamine     |
| 3-methylfluoranthene                                                                   | Dibenz [a,h] acridine     | NPIP                         |
| 3-methylpyridine                                                                       | Dibenz [a,j] acridine *   | NPY *                        |
| 4-aminobiphenyl                                                                        | Dibenz[-]anthracenes *    | ortho-anisidine              |
| 4-methylchrysene                                                                       | Dibenzo [a,e]pyrene       | o-cresol†                    |
| 5-Methylchrysene *                                                                     | Dibenzo [a,h]pyrene       | o-toluidine                  |
| 6-methylchrysene                                                                       | Dibenzo [a,i]pyrene       | p-cresol†                    |
| 7H-Dibenzo[c,g]carbazole                                                               | Dibenzo[a,e]fluoranthene  | Perylene                     |
| Acenaphthene†                                                                          | Endrin                    | pH (acidity)                 |
| Acenaphthylene†                                                                        | Ethylene oxide            | Phenanthrene *               |
| Acetaldehyde *                                                                         | Eugenol                   | Phenol *                     |
| Acetamide                                                                              | Fluoranthene *            | Propionaldehyde              |
| Acetic Acid                                                                            | Fluorene *                | Propylene oxide              |
| Acetone                                                                                | Formaldehyde *            | Pyrene *                     |
| Acrolein *                                                                             | Formic Acid               | Pyridine                     |
| Acrylonitrile *                                                                        | Hydrazine                 | Reduct/oxidat potential      |
| Ammonia‡                                                                               | Hydrogen cyanide *        | Resorcinol *                 |
| Aniline                                                                                | Hydroquinone *            | Selenium                     |
| Anthanthrene                                                                           | Indeno [1,2,3-cd]pyrene * | Styrene                      |
| Anthracene *                                                                           | Isoprene (µg/cig) *       | Succinic anhydride           |
| Arsenic *                                                                              | Lead (ng/cig) *           | Tar                          |
| Benz[a]acridine                                                                        | Malathion                 | Toluene *                    |
| Benz[a]anthracene *                                                                    | Maleic anhydride          | TPM *                        |
| Benz[c]acridine                                                                        | Maleic hydrazide          | Triphenylene                 |
| Benzene *                                                                              | m-cresol†                 | Urethane                     |
| Benzo[-] fluorene                                                                      | Methanol                  | Vinyl chloride *             |
| Benzo[-]fluoranthenes *                                                                | Methyl acrylate           | Water *                      |
| Benzo[a]pyrene *                                                                       | NAB *                     | γ-butyrolactose              |
| *Included in Project MIX and CSPP or IARC                                              |                           |                              |
| ‡Included in Project MIX but not CSPP or IARC                                          |                           |                              |

‡Included in Project MIX but not reported [1]

|                                                                                                                                                                                                                                                                 |                               |                          |
|-----------------------------------------------------------------------------------------------------------------------------------------------------------------------------------------------------------------------------------------------------------------|-------------------------------|--------------------------|
| Acenaphthalene L* IG2 & IG3                                                                                                                                                                                                                                     | Acenaphthene L IG2 & IG3      | Fluorene L IG2           |
| Phenanthrene H IG1 & IG3 L IG2                                                                                                                                                                                                                                  | Anthracene H IG1 & IG3 L IG2  | Fluoranthene H IG1 & IG3 |
| Pyrene H IG1 & IG3                                                                                                                                                                                                                                              | Benz[a]anthracene H IG1 & IG3 | Chrysene H IG1 & IG3     |
| Benzo[-]fluoranthenes H All groups                                                                                                                                                                                                                              | Indeno [1,2,3-cd]pyrene H IG1 | Dibenz[-]anthracenes     |
| Benzo[ghi]perylene H All groups                                                                                                                                                                                                                                 | 5-Methylchrysene              | Dibenz[a,j]acridine      |
| NDMA                                                                                                                                                                                                                                                            | NDELA                         | Chromium                 |
| Nickel                                                                                                                                                                                                                                                          |                               |                          |
| * indicates change in additive-added smoke is statistically different from control-cigarette smoke on a per cigarette basis<br>(L=lower than control, H=higher than control, IG=Ingredient Group) reported in Rustemeier et al.'s [1] published Table 2 (2002). |                               |                          |

| <b>Table S-3. Statistically Significant Toxicological Changes Associated with Smoke from Cigarettes from the Three Additive Groups with Two Different Sample Sizes (Only significant results are shown.)</b> |                                                                                           |                    |                                                     |                                 |
|--------------------------------------------------------------------------------------------------------------------------------------------------------------------------------------------------------------|-------------------------------------------------------------------------------------------|--------------------|-----------------------------------------------------|---------------------------------|
| <b>Health Parameter</b>                                                                                                                                                                                      | <b>Published Statistics Based on Observed Data [2]<br/>(N=4-14 per group<sup>†</sup>)</b> |                    | <b>Assuming Same Mean and SD but N=50 per group</b> |                                 |
|                                                                                                                                                                                                              | <b>Male Rats</b>                                                                          | <b>Female Rats</b> | <b>Male Rats</b>                                    | <b>Female Rats</b>              |
| Carboxyhemoglobin proportion in blood (%)                                                                                                                                                                    |                                                                                           |                    | Increased 1L<br>Decreased 2L 1H                     | Decreased all                   |
| Urinary Nicotine metabolites* (%) NCOT                                                                                                                                                                       |                                                                                           |                    | Increased 1L<br>Decreased 1H                        | Increased 1L 2L 3H              |
| <b>Serum Chemistry</b>                                                                                                                                                                                       |                                                                                           |                    |                                                     |                                 |
| Alkaline Phosphatase                                                                                                                                                                                         |                                                                                           |                    | Decreased 2L                                        | Increased 2H                    |
| Aspartate aminotransferase (AST)                                                                                                                                                                             |                                                                                           |                    |                                                     | Increased 2H<br>Decreased 3H    |
| Alanine aminotrasferase (ALT)                                                                                                                                                                                |                                                                                           |                    | Decreased 1H 2H                                     | Increased 2H<br>Decreased 3L 3H |
| γGlutamyltransferase (GGT)                                                                                                                                                                                   |                                                                                           |                    |                                                     | Increased 1L 2L 2H 3L           |
| Total Cholesterol                                                                                                                                                                                            | Increased 2L 3L 3H                                                                        |                    | Increased 1L 2L 2H 3L 3H                            | Increased 3L                    |
| Triglycerides                                                                                                                                                                                                |                                                                                           |                    |                                                     | Increased 1L 2L 2H 3L           |
| Glucose                                                                                                                                                                                                      |                                                                                           |                    |                                                     | Decreased 1H 2L 2H 3L           |
| Urea                                                                                                                                                                                                         | Decreased 3L 3H                                                                           | Increased 1H 2L    | Decreased all                                       | Increased all                   |
| <b>Hematology</b>                                                                                                                                                                                            |                                                                                           |                    |                                                     |                                 |
| Erythrocyte count                                                                                                                                                                                            |                                                                                           |                    | Increased 2L 3L 3H                                  | Increased 1H 2H 3L              |
| Hematocrit                                                                                                                                                                                                   |                                                                                           |                    | Increased 1H 2L 3L                                  | Increased 1H 2H 3L              |
| Hemoglobin                                                                                                                                                                                                   |                                                                                           |                    | Increased 1H 2L 2H 3L 3H                            | Increased 2H 3L                 |
| Platelet count                                                                                                                                                                                               |                                                                                           |                    | Increased 3H                                        | Increased 1L 2L 3L 3H           |
| Leukocyte count                                                                                                                                                                                              |                                                                                           |                    | Increased 1L 2H                                     | Increased 1L 2H                 |
| Neutrophil count                                                                                                                                                                                             |                                                                                           |                    |                                                     | Decreased 3H                    |
| Lymphocyte count                                                                                                                                                                                             |                                                                                           |                    | Increased 1L 2H 3L 3H                               | Decreased 1L 2H                 |
| <b>Organ Weights</b>                                                                                                                                                                                         |                                                                                           |                    |                                                     |                                 |
| Thymus                                                                                                                                                                                                       | Increased 1L 1H 2H 3L 3H                                                                  | Increased 3H       | Increased all                                       | Increased 3H<br>Decreased 1L    |
| Liver                                                                                                                                                                                                        | Increased 2H                                                                              |                    | Increased 2H 3H                                     | Increased 2L                    |
| Adrenals                                                                                                                                                                                                     |                                                                                           |                    |                                                     | Increased 1L 2L 2H              |
| Lungs                                                                                                                                                                                                        | Increased 2H                                                                              |                    | Increased 1H 2L                                     | Increased 1L 1H 2L 3H           |
| Kidneys                                                                                                                                                                                                      |                                                                                           |                    |                                                     |                                 |
| <b>Histopathology in Nose</b>                                                                                                                                                                                |                                                                                           |                    |                                                     |                                 |
| <i>Nasal Cavity Level 1</i>                                                                                                                                                                                  |                                                                                           |                    |                                                     |                                 |
| Resp. epithelium, reserve cell hyperplasia                                                                                                                                                                   |                                                                                           | Increased 1L       | Decreased 1L 1H 2H                                  | Increased 1L 1H 2L 2H 3L        |

|                                                         |              |                 |                       |                              |
|---------------------------------------------------------|--------------|-----------------|-----------------------|------------------------------|
| Squamous metaplasia                                     |              |                 |                       | Increased 3H<br>Decreased 2H |
| Goblet-cell hyperplasia                                 |              |                 |                       | Increased 3H                 |
| Loss of goblet cells                                    |              |                 | Increased 1L 1H 2L    | Decreased 2L 2H 3L 3H        |
| <i>Nasal Cavity Level 2</i>                             |              |                 |                       |                              |
| Resp. epithelium, reserve cell hyperplasia              |              |                 |                       | Increased 2H 3H              |
| Olfactory epithelium atrophy                            | Decreased 2H | Increased 2L 2H | Decreased 1L 2H 3L    | Increased 1L 1H 2L 2H 3L     |
| Squamous metaplasia                                     |              |                 |                       | Increased 2H                 |
| <i>Nasal Cavity Level 3</i>                             |              |                 |                       |                              |
| Olfactory epithelium atrophy                            |              | Increased 2L 2H | Decreased 2H 3L       | Increased 1L 1H 2L 2H 3L     |
| Squamous metaplasia                                     |              | Increased 2H    | Decreased 2H          | Increased 1L 1H 2L 2H 3L     |
| <i>Nasal cavity Level 4</i>                             |              |                 |                       |                              |
| Olfactory epithelium atrophy                            |              |                 |                       | Increased 1L 2L              |
| Squamous metaplasia                                     |              |                 | Decreased 2H          | Increased 1L 2H              |
| <b>Histopathology of Larynx</b>                         |              |                 |                       |                              |
| <i>Base of Epiglottis</i>                               |              |                 |                       |                              |
| Pseudostratified epithelium squamous metaplasia         |              |                 | Increased 2L 2H       | Decreased 1H 3L 3H           |
| Squamous epithelium hyperplasia                         |              |                 | Increased 1H 2L 2H 3L | Increased 1H                 |
| <i>Floor of larynx (arythenoid projections)</i>         |              |                 |                       |                              |
| Pseudostratified epithelium squamous metaplasia         |              | Decreased 3H    |                       | Decreased All                |
| <i>Vocal cords, lower medial</i>                        |              |                 |                       |                              |
| Squamous epithelium hyperplasia                         |              |                 | Decreased 1L 3H       | Decreased 1H 3L 3H           |
| <i>Vocal cords, upper medial</i>                        |              |                 |                       |                              |
| Pseudostratified epithelium squamous metaplasia         |              |                 |                       |                              |
| <i>Vocal folds</i>                                      |              |                 |                       |                              |
| Squamous epithelium hyperplasia                         |              |                 |                       | Decreased 1H 2L 2H           |
| <b>Thickness of laryngeal epithelium</b>                |              |                 |                       |                              |
| <i>Floor of the Lanryx</i>                              | Increased 3L | Increased 3L 3H | Increased 2L 2H 3L    | Decreased 1H 3L 3H           |
| <b>Histopathology of the Trachea, Bronchi and Lungs</b> |              |                 |                       |                              |
| <i>Tracheal Bifurcation</i>                             |              |                 |                       |                              |
| Resp. epithelium goblet cell                            |              |                 | Increased 2L          | Decreased 3H                 |

|                                                                                                                                                                                                                                                                                                                                                                                                                                                                                                                                                                                                                                                                                                                                                                                                                                                                                                                                                                |  |  |                              |                              |
|----------------------------------------------------------------------------------------------------------------------------------------------------------------------------------------------------------------------------------------------------------------------------------------------------------------------------------------------------------------------------------------------------------------------------------------------------------------------------------------------------------------------------------------------------------------------------------------------------------------------------------------------------------------------------------------------------------------------------------------------------------------------------------------------------------------------------------------------------------------------------------------------------------------------------------------------------------------|--|--|------------------------------|------------------------------|
| hyperplasia                                                                                                                                                                                                                                                                                                                                                                                                                                                                                                                                                                                                                                                                                                                                                                                                                                                                                                                                                    |  |  |                              |                              |
| <i>Right Lung</i>                                                                                                                                                                                                                                                                                                                                                                                                                                                                                                                                                                                                                                                                                                                                                                                                                                                                                                                                              |  |  |                              |                              |
| Alveolar macrophages                                                                                                                                                                                                                                                                                                                                                                                                                                                                                                                                                                                                                                                                                                                                                                                                                                                                                                                                           |  |  | Increased 3H                 | Increased 3H<br>Decreased 2H |
| <i>Left Lung</i>                                                                                                                                                                                                                                                                                                                                                                                                                                                                                                                                                                                                                                                                                                                                                                                                                                                                                                                                               |  |  |                              |                              |
| Resp. epithelium goblet cell hyperplasia                                                                                                                                                                                                                                                                                                                                                                                                                                                                                                                                                                                                                                                                                                                                                                                                                                                                                                                       |  |  | Increased 2H                 | Decreased 3H                 |
| Alveolar macrophages                                                                                                                                                                                                                                                                                                                                                                                                                                                                                                                                                                                                                                                                                                                                                                                                                                                                                                                                           |  |  | Increased 3H<br>Decreased 2H |                              |
| <p>†N varied (e.g.4-5 rats per group for HbCO%, 8 rats per group for nicotine metabolites, 8-10 rats per group for chemistry, hematology, and pathology exams except 14 rats in all control groups).</p> <p>Number = Ingredient Group (e.g. 2=Ingredient Group 2); L or H refers to low or high level of additives in Ingredient Group.</p> <p>Only statistically significant differences reported by the PM investigators[2] (first two columns, using analytical methods described in that paper) and the authors' reanalysis (last two columns) assuming the same means and standard deviation as PM reported, but increasing the sample size to 50 rats in each group.</p> <p>An empty box indicates no significant statistical difference.</p> <p>*Cigarettes with additives are reported to have less tobacco (substituted by the additives), and therefore less nicotine, which may account for the decrease in cotinine levels when there was one.</p> |  |  |                              |                              |

## REFERENCES

1. Rustemeier K, Stabbert R, Haussmann HJ, Roemer E, Carmines EL (2002) Evaluation of the potential effects of ingredients added to cigarettes. Part 2: chemical composition of mainstream smoke. *Food Chem Toxicol* 40: 93-104.
2. Vanscheeuwijck PM, Teredesai A, Terpstra PM, Verbeeck J, Kuhl P, et al. (2002) Evaluation of the potential effects of ingredients added to cigarettes. Part 4: subchronic inhalation toxicity. *Food Chem Toxicol* 40: 113-131.
